# Supplementary material
Source: PubMed Central journal article supplement (PMC4619145)
Supplement: NIHMS720531-supplement.pdf [file NIHMS720531-supplement.pdf]

**Supporting Information for “Comprehensive Mapping of Functional Epitopes on Dengue Virus Glycoprotein E DIII for Binding to Broadly Neutralizing Antibodies 4E11 and 4E5A by Phage Display”**

*Julia C. Frei,<sup>1</sup> Margaret Kielian,<sup>2</sup> and Jonathan R. Lai<sup>1,\*</sup>*

Departments of <sup>1</sup>Biochemistry and <sup>2</sup>Cell Biology, Albert Einstein College of Medicine, 1300 Morris Park Avenue, Bronx, NY, USA 10461

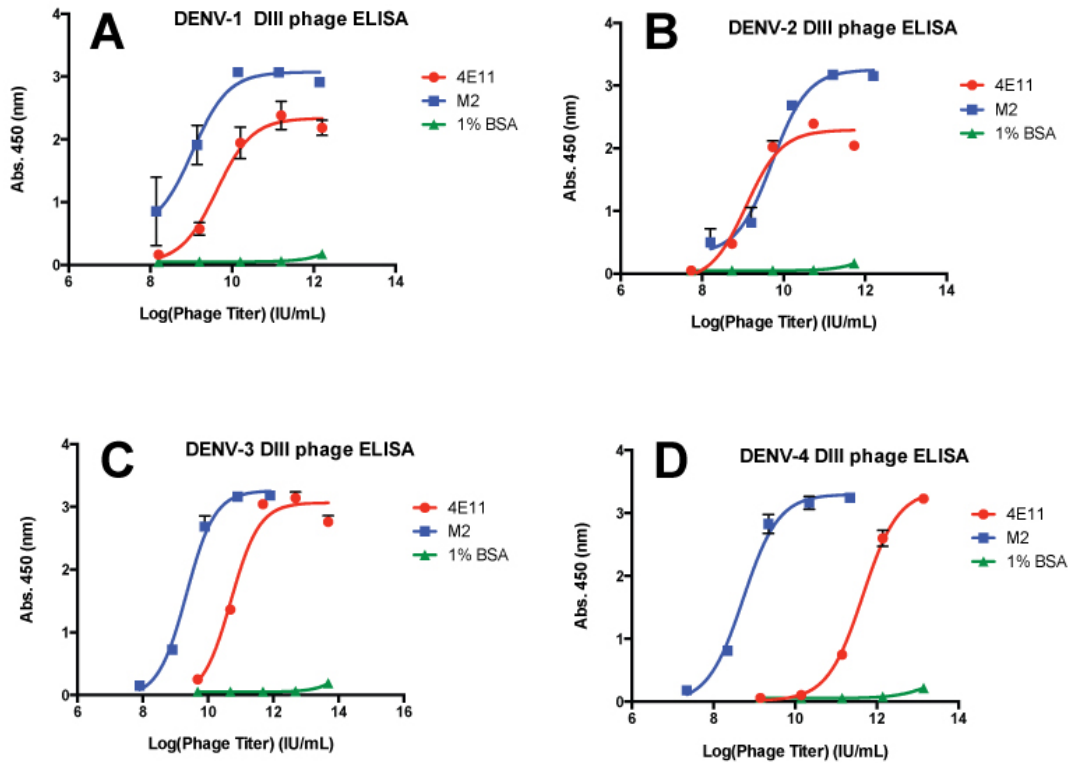

**Figure S1 Validation of Phage-Expressed DIII.** Phage ELISA for DENV-1 (A), DENV-2 (B), DENV-3 (C), and DENV-4 (D) against anti-FLAG antibody M2, 4E11, and 1% BSA.

**Table S1 – Percent Identity and Similarity of DENV Glycoprotein E DIII Domains.<sup>A</sup>**

|               | <b>DENV-1</b> | <b>DENV-2</b> | <b>DENV-3</b> | <b>DENV-4</b> |
|---------------|---------------|---------------|---------------|---------------|
| <b>DENV-1</b> | --            | 65/79         | 70/87         | 55/71         |
| <b>DENV-2</b> | 65/79         | --            | 60/80         | 62/77         |
| <b>DENV-3</b> | 70/87         | 60/80         | --            | 51/68         |
| <b>DENV-4</b> | 55/71         | 62/77         | 51/68         | --            |

<sup>A</sup> For each pairwise alignment, the % identity/% similarity are shown.

**Primers used for Library synthesis (listed 5' -> 3'):**

**DENV-1:**

Library 1:

GTGATGTGCACCGGKCCCTTCRMASYTGMARMAGMAGYTGCCGAAACCCAGCAT,  
CCGATTGTGACCGACRMAGMAAAASCAGTGRMCATCGAAACCGAACCG,

Library 2:

GGTACAGTGCTGGTGS MAGTGRMATATGMAGGCACCGATGCCSCATGCAAAAATCCCGTTT,  
ATCGTGGGCGCCGGCGMARMAGCCSYTRMASYTKCKSGTTCAAGAAAGGCAGC;

**DENV-2:**

Library 1:

AGCATGTGCACCGGCRMATTTMARYTGYTRMAGMARYTGCCGAAACCCAGCAT,  
AACCCGATTGTGACCGMARMAGMTAGCSCAGTGRMCATTGAAGCCGAACCG,

Library 2:

GGCACCATTGTGATCSSTGTGSMATATGMAGGCGATGGTAGCSCATGCAAAAATCCCGTTC,  
ATCATTGGCGTGGAGSCAGSTCAGSYTRMASYTRMCKSGTTCAAGAAGGGCAGC;

**DENV-3:**

Library 1:

GCCATGTGCCTGAACRCTTTTCGYTSYTRMARMAGMAGYTAGCGAAACCCAGCAT,  
CCGGTGGTGACCAAGRMAGMAGAGSCAGTGRMCATCGAAGCCGAACCG,

Library 2:

GGCACAATCCTGATCRMAGTGGMATACRMAGGCGAGGATGCCSCATGCAAAAATCCCGTTT,  
GTGATCGGCATCGGCGMTRMAGCCSYTRMARYTRMCKSGTACAAAAAAGGTAGC;

**DENV-4:**

Library 1:

ACCATGTGCAGCGGCRMATTKCCRYTGMTRMAGMARYGGCCGAAACCCAGCAT,  
CCGTTCGCCGAAAACRCTRMCAGCGYTACRCMCATCGAACTGGAACCG,

Library 2:

GGCACCACCGTGGTGRMAGTGRMATAACGMAGGCGCAGGTGCCSCATGCAAAGTGCCGATC,  
GTGATTGGCGTGGGCGMTKCCGCCSYTRCTSYTSMKSGTTCCGCAAAGGCAGC.

**Table S2 – Number of ELISA-Positive Sequences Used for Analysis**

| <b>Library</b>    | <b>4E11 # Sequences</b> | <b>M2 # Sequences</b> |
|-------------------|-------------------------|-----------------------|
| <b>4E11:</b>      |                         |                       |
| DENV-1 Library #1 | 125                     | 151                   |
| DENV-1 Library #2 | 121                     | 130                   |
| DENV-2 Library #1 | 95                      | 144                   |
| DENV-2 Library #2 | 160                     | 63                    |
| DENV-3 Library #1 | 169                     | 156                   |
| DENV-3 Library #2 | 114                     | 157                   |
| DENV-4 Library #1 | 157                     | 157                   |
| <b>4E5A:</b>      |                         |                       |
| DENV-1 Library #1 | 48                      | 151                   |
| DENV-1 Library #2 | 51                      | 130                   |
| DENV-4 Library #1 | 103                     | 157                   |
| DENV-4 Library #2 | 75                      | 167                   |

“Library 1” positions: 305, 307, 308, 309, 310, 311, 312, 360 (DENV-2 only), 361, 362, 364, 366

“Library 2” positions: 323, 325, 327, 332, 384, 385, 387, 388, 389, 390, 391

**Table S3 – Frequency of Observed Residues from Combinatorial Alanine Scanning against 4E11 for DENV-1**

| Res. | 4E11 Selection (Function) |     |        |        | M2 Selection (Display) |     |        |        |
|------|---------------------------|-----|--------|--------|------------------------|-----|--------|--------|
|      | WT                        | Ala | m2     | m3     | WT                     | Ala | m2     | m3     |
| S305 | 72                        | 69  | -      | -      | 100                    | 71  | -      | -      |
| K307 | 73                        | 16  | 12 (E) | 39 (T) | 81                     | 21  | 26 (E) | 43 (T) |
| L308 | 78                        | 17  | 6 (P)  | 38 (V) | 93                     | 26  | 9 (P)  | 43 (V) |
| E309 | 84                        | 56  | -      | -      | 99                     | 71  | -      | -      |
| K310 | 119                       | 5   | 4 (E)  | 13 (T) | 79                     | 25  | 48 (E) | 19 (T) |
| E311 | 84                        | 55  | -      | -      | 126                    | 45  | -      | -      |
| V312 | 101                       | 38  | -      | -      | 106                    | 65  | -      | -      |
| Q323 | 57                        | 20  | 24 (E) | 21 (P) | 42                     | 28  | 41 (E) | 23 (P) |
| K325 | 54                        | 14  | 18 (E) | 36 (T) | 55                     | 21  | 36 (E) | 22 (T) |
| E327 | 85                        | 37  | -      | -      | 99                     | 33  | -      | -      |
| P332 | 121                       | 3   | -      | -      | 112                    | 22  | -      | -      |
| K361 | 62                        | 28  | 28 (E) | 22 (T) | 83                     | 15  | 33 (E) | 31 (T) |
| E362 | 83                        | 56  | -      | -      | 104                    | 57  | -      | -      |
| P364 | 61                        | 79  | -      | -      | 80                     | 81  | -      | -      |
| N366 | 40                        | 42  | 35 (D) | 23 (T) | 62                     | 33  | 27 (D) | 40 (T) |
| E384 | 93                        | 39  | -      | -      | 114                    | 49  | -      | -      |
| K385 | 50                        | 17  | 29 (E) | 37 (T) | 47                     | 21  | 50 (E) | 43 (T) |
| L387 | 88                        | 5   | 3 (P)  | 37 (V) | 74                     | 28  | 20 (P) | 40 (V) |
| K388 | 62                        | 24  | 17 (E) | 30 (T) | 44                     | 34  | 46 (E) | 39 (T) |
| L389 | 62                        | 7   | 1 (P)  | 62 (V) | 48                     | 24  | 21 (P) | 70 (V) |
| S390 | 80                        | 52  | -      | -      | 87                     | 76  | -      | -      |
| W391 | 63                        | 12  | 28 (G) | 29 (S) | 43                     | 26  | 58 (G) | 35 (S) |

**Table S4 – Frequency of Observed Residues from Combinatorial Alanine Scanning against 4E11 for DENV-2**

| Res. | 4E11 Selection (Function) |     |        |        | M2 Selection (Display) |     |        |        |
|------|---------------------------|-----|--------|--------|------------------------|-----|--------|--------|
|      | WT                        | Ala | m2     | m3     | WT                     | Ala | m2     | m3     |
| S305 | 57                        | 10  | 14 (E) | 14 (T) | 53                     | 23  | 37 (E) | 32 (T) |
| K307 | 70                        | 2   | 2 (E)  | 21 (T) | 48                     | 22  | 31 (E) | 44 (T) |
| I308 | 60                        | 4   | 5 (T)  | 26 (V) | 61                     | 13  | 15 (T) | 56 (V) |
| V309 | 60                        | 35  | -      | -      | 103                    | 42  | -      | -      |
| K310 | 75                        | 7   | 4 (E)  | 9 (T)  | 52                     | 27  | 38 (E) | 28 (T) |
| E311 | 66                        | 29  | -      | -      | 97                     | 48  | -      | -      |
| I312 | 60                        | 3   | 2 (T)  | 30 (V) | 48                     | 26  | 19 (T) | 52 (V) |
| R323 | 14                        | 22  | 42 (G) | 82 (P) | 15                     | 16  | 12 (G) | 21 (P) |
| Q325 | 85                        | 45  | 30 (E) | 0 (P)  | 22                     | 13  | 18 (E) | 11 (P) |
| E327 | 137                       | 23  | -      | -      | 38                     | 26  | -      | -      |
| P332 | 157                       | 3   | -      | -      | 28                     | 31  | -      | -      |
| E360 | 72                        | 34  | -      | -      | 87                     | 59  | -      | -      |
| K361 | 41                        | 28  | 15 (E) | 22 (T) | 31                     | 33  | 52 (E) | 32 (T) |
| D362 | 69                        | 37  | -      | -      | 93                     | 54  | -      | -      |
| P364 | 56                        | 50  | -      | -      | 63                     | 84  | -      | -      |
| N366 | 34                        | 15  | 41 (D) | 16 (T) | 37                     | 15  | 68 (D) | 26 (T) |
| P384 | 140                       | 20  | -      | -      | 24                     | 40  | -      | -      |
| G385 | 94                        | 66  | -      | -      | 45                     | 19  | -      | -      |
| L387 | 94                        | 8   | 0 (P)  | 58 (V) | 14                     | 16  | 14 (P) | 20 (V) |
| K388 | 38                        | 40  | 53 (E) | 29 (T) | 19                     | 19  | 11 (E) | 15 (T) |
| L389 | 81                        | 6   | 0 (P)  | 73 (V) | 14                     | 14  | 11 (P) | 24 (V) |
| N390 | 75                        | 34  | 7 (D)  | 44 (T) | 19                     | 13  | 17 (D) | 14 (T) |
| W391 | 154                       | 2   | 1 (G)  | 3 (S)  | 13                     | 11  | 24 (G) | 13 (S) |

**Table S5 – Frequency of Observed Residues from Combinatorial Alanine Scanning against 4E11 for DENV-3**

| Res. | 4E11 Selection (Function) |     |        |        | M2 Selection (Display) |     |        |        |
|------|---------------------------|-----|--------|--------|------------------------|-----|--------|--------|
|      | WT                        | Ala | m2     | m3     | WT                     | Ala | m2     | m3     |
| T305 | 77                        | 93  | -      | -      | 68                     | 88  | -      | -      |
| V307 | 137                       | 33  | -      | -      | 115                    | 42  | -      | -      |
| L308 | 158                       | 5   | 0 (P)  | 7 (V)  | 95                     | 16  | 8 (P)  | 38 (V) |
| K309 | 30                        | 76  | 22 (E) | 42 (T) | 51                     | 40  | 26 (E) | 40 (T) |
| K310 | 103                       | 16  | 20 (E) | 31 (T) | 47                     | 17  | 73 (E) | 20 (T) |
| E311 | 128                       | 42  | -      | -      | 97                     | 60  | -      | -      |
| V312 | 160                       | 10  | -      | -      | 132                    | 25  | -      | -      |
| K323 | 17                        | 2   | 67 (E) | 28 (T) | 44                     | 14  | 75 (E) | 25 (T) |
| E325 | 109                       | 5   | -      | -      | 140                    | 18  | -      | -      |
| K327 | 105                       | 2   | 0 (E)  | 7 (T)  | 55                     | 22  | 53 (E) | 28 (T) |
| P332 | 114                       | 0   | -      | -      | 84                     | 74  | -      | -      |
| K361 | 65                        | 46  | 28 (E) | 31 (T) | 48                     | 39  | 55 (E) | 15 (T) |
| E362 | 113                       | 57  | -      | -      | 111                    | 47  | -      | -      |
| P364 | 83                        | 87  | -      | -      | 64                     | 94  | -      | -      |
| N366 | 30                        | 27  | 43 (D) | 69 (T) | 40                     | 23  | 44 (D) | 51 (T) |
| D384 | 62                        | 52  | -      | -      | 99                     | 59  | -      | -      |
| K385 | 69                        | 12  | 19 (E) | 14 (T) | 55                     | 18  | 49 (E) | 49 (T) |
| L387 | 110                       | 0   | 0 (P)  | 4 (V)  | 50                     | 33  | 26 (P) | 49 (V) |
| K388 | 98                        | 3   | 0 (E)  | 13 (T) | 38                     | 35  | 40 (E) | 43 (T) |
| I389 | 93                        | 0   | 0 (T)  | 21 (V) | 58                     | 32  | 20 (T) | 47 (V) |
| N390 | 63                        | 38  | 9 (D)  | 4 (T)  | 39                     | 34  | 47 (D) | 38 (T) |
| W391 | 95                        | 6   | 5 (G)  | 6 (S)  | 39                     | 34  | 55 (G) | 30 (S) |

**Table S6 – Frequency of Observed Residues from Combinatorial Alanine Scanning against 4E11 for DENV-4**

| Res. | 4E11 Selection (Function) |     |                 |        | M2 Selection (Display) |     |                 |        |
|------|---------------------------|-----|-----------------|--------|------------------------|-----|-----------------|--------|
|      | WT                        | Ala | m2              | m3     | WT                     | Ala | m2              | m3     |
| K305 | 109                       | 23  | 11 (E)          | 15 (T) | 75                     | 36  | 35 (E)          | 12 (T) |
| S307 | 156                       | 2   | -               | -      | 138                    | 20  | -               | -      |
| I308 | 121                       | 0   | 0 (T)           | 37 (V) | 89                     | 5   | 12 (T)          | 52 (V) |
| D309 | 2                         | 155 | -               | -      | 58                     | 100 | -               | -      |
| K310 | 157                       | 1   | 0 (E)           | 0 (T)  | 38                     | 8   | 87 (E)          | 25 (T) |
| E311 | 132                       | 26  | -               | -      | 119                    | 39  | -               | -      |
| M312 | 92                        | 9   | 0 (T)           | 57 (V) | 85                     | 17  | 16 (T)          | 40 (V) |
| K323 |                           |     | ND <sup>A</sup> |        |                        |     | ND <sup>A</sup> |        |
| K325 |                           |     | ND <sup>A</sup> |        |                        |     | ND <sup>A</sup> |        |
| E327 |                           |     | ND <sup>A</sup> |        |                        |     | ND <sup>A</sup> |        |
| P332 |                           |     | ND <sup>A</sup> |        |                        |     | ND <sup>A</sup> |        |
| T361 | 124                       | 34  | -               | -      | 110                    | 48  | -               | -      |
| N362 | 54                        | 15  | 66 (D)          | 23 (T) | 62                     | 18  | 47 (D)          | 31 (T) |
| V364 | 136                       | 21  | -               | -      | 128                    | 29  | -               | -      |
| N366 | 22                        | 20  | 87 (D)          | 29 (T) | 28                     | 47  | 55 (D)          | 27 (T) |
| D384 |                           |     | ND <sup>A</sup> |        |                        |     | ND <sup>A</sup> |        |
| S385 |                           |     | ND <sup>A</sup> |        |                        |     | ND <sup>A</sup> |        |
| L387 |                           |     | ND <sup>A</sup> |        |                        |     | ND <sup>A</sup> |        |
| T388 |                           |     | ND <sup>A</sup> |        |                        |     | ND <sup>A</sup> |        |
| L389 |                           |     | ND <sup>A</sup> |        |                        |     | ND <sup>A</sup> |        |
| H390 |                           |     | ND <sup>A</sup> |        |                        |     | ND <sup>A</sup> |        |
| W391 |                           |     | ND <sup>A</sup> |        |                        |     | ND <sup>A</sup> |        |

<sup>A</sup> ND = not determined due to inefficient library screening

**Table S7 – Frequency of Observed Residues from Combinatorial Alanine Scanning against 4E5A for DENV-1**

| Res. | 4E5A Selection (Function) |     |        |        | M2 Selection (Display) |     |        |        |
|------|---------------------------|-----|--------|--------|------------------------|-----|--------|--------|
|      | WT                        | Ala | m2     | m3     | WT                     | Ala | m2     | m3     |
| S305 | 23                        | 25  | -      | -      | 100                    | 71  | -      | -      |
| K307 | 30                        | 5   | 4 (E)  | 9 (T)  | 81                     | 21  | 26 (E) | 43 (T) |
| L308 | 35                        | 1   | 1 (P)  | 11 (V) | 93                     | 26  | 9 (P)  | 43 (V) |
| E309 | 24                        | 24  | -      | -      | 99                     | 71  | -      | -      |
| K310 | 44                        | 1   | 1 (E)  | 2 (T)  | 79                     | 25  | 48 (E) | 19 (T) |
| E311 | 32                        | 16  | -      | -      | 126                    | 45  | -      | -      |
| V312 | 32                        | 16  | -      | -      | 106                    | 65  | -      | -      |
| Q323 | 22                        | 10  | 7 (E)  | 12 (P) | 42                     | 28  | 41 (E) | 23 (P) |
| K325 | 22                        | 4   | 13 (E) | 12 (T) | 55                     | 21  | 36 (E) | 22 (T) |
| E327 | 38                        | 13  | -      | -      | 99                     | 33  | -      | -      |
| P332 | 42                        | 9   | -      | -      | 112                    | 22  | -      | -      |
| K361 | 22                        | 4   | 14 (E) | 8 (T)  | 83                     | 15  | 33 (E) | 31 (T) |
| E362 | 27                        | 21  | -      | -      | 104                    | 57  | -      | -      |
| P364 | 19                        | 29  | -      | -      | 80                     | 81  | -      | -      |
| N366 | 15                        | 19  | 6 (D)  | 8 (T)  | 62                     | 33  | 27 (D) | 40 (T) |
| E384 | 37                        | 14  | -      | -      | 114                    | 49  | -      | -      |
| K385 | 20                        | 7   | 7 (E)  | 17 (T) | 47                     | 21  | 50 (E) | 43 (T) |
| L387 | 35                        | 4   | 2 (P)  | 10 (V) | 74                     | 28  | 20 (P) | 40 (V) |
| K388 | 30                        | 7   | 9 (E)  | 5 (T)  | 44                     | 34  | 46 (E) | 39 (T) |
| L389 | 21                        | 3   | 3 (P)  | 24 (V) | 48                     | 24  | 21 (P) | 70 (V) |
| S390 | 30                        | 21  | -      | -      | 87                     | 76  | -      | -      |
| W391 | 22                        | 4   | 14 (G) | 10 (S) | 43                     | 26  | 58 (G) | 35 (S) |

**Table S8 – Frequency of Observed Residues from Combinatorial Alanine Scanning against 4E5A for DENV-4**

| Res. | 4E5A Selection (Function) |     |        |        | M2 Selection (Display) |     |        |        |
|------|---------------------------|-----|--------|--------|------------------------|-----|--------|--------|
|      | WT                        | Ala | m2     | m3     | WT                     | Ala | m2     | m3     |
| K305 | 90                        | 7   | 4 (E)  | 2 (T)  | 75                     | 36  | 35 (E) | 12 (T) |
| S307 | 98                        | 5   | -      | -      | 138                    | 20  | -      | -      |
| I308 | 78                        | 0   | 2 (T)  | 23 (V) | 89                     | 5   | 12 (T) | 52 (V) |
| D309 | 5                         | 98  | -      | -      | 58                     | 100 | -      | -      |
| K310 | 100                       | 1   | 0 (E)  | 2 (T)  | 38                     | 8   | 87 (E) | 25 (T) |
| E311 | 97                        | 6   | -      | -      | 119                    | 39  | -      | -      |
| M312 | 75                        | 4   | 1 (T)  | 22 (V) | 85                     | 17  | 16 (T) | 40 (V) |
| K323 | 64                        | 11  | 0 (E)  | 0 (T)  | 57                     | 18  | 71 (E) | 23 (T) |
| K325 | 61                        | 1   | 3 (E)  | 10 (T) | 63                     | 16  | 55 (E) | 35 (T) |
| E327 | 45                        | 30  | -      | -      | 116                    | 53  | -      | -      |
| P332 | 75                        | 0   | -      | -      | 85                     | 84  | -      | -      |
| T361 | 87                        | 16  | -      | -      | 110                    | 48  | -      | -      |
| N362 | 47                        | 8   | 37 (D) | 10 (T) | 62                     | 18  | 47 (D) | 31 (T) |
| V364 | 96                        | 7   | -      | -      | 128                    | 29  | -      | -      |
| N366 | 14                        | 17  | 46 (D) | 26 (T) | 28                     | 47  | 55 (D) | 27 (T) |
| D384 | 54                        | 12  | -      | -      | 127                    | 42  | -      | -      |
| S385 | 58                        | 17  | -      | -      | 120                    | 48  | -      | -      |
| L387 | 50                        | 3   | 0 (P)  | 22 (V) | 42                     | 43  | 12 (P) | 72 (V) |
| T388 | 53                        | 22  | -      | -      | 100                    | 69  | -      | -      |
| L389 | 52                        | 0   | 0 (P)  | 23 (V) | 62                     | 23  | 30 (P) | 52 (V) |
| H390 | 42                        | 2   | 1 (D)  | 30 (P) | 34                     | 19  | 46 (D) | 68 (P) |
| W391 | 55                        | 4   | 1 (G)  | 15 (S) | 45                     | 19  | 50 (G) | 53 (S) |
